# Supplementary material for: Bio-inspired smart electronic-skin based on inorganic perovskite nanoplates for application in photomemories and mechanoreceptors
Source: Royal Society of Chemistry journal article supplement (doi:10.1039/d0nr06550a), 2020-11-28
Supplement: d0nr06550a1.pdf [file d0nr06550a1.pdf]

## Supporting Information

### **Bio-inspired Smart Electronic-Skin Relies on Inorganic Perovskite Nanoplates for Application in Photo-memories and Mechanoreceptors**

Zhongwei Xu<sup>1†</sup>, Chaoxing Wu<sup>1†</sup>, Yangbin Zhu<sup>1</sup>, Songman Ju<sup>1</sup>, Fumin Ma<sup>1</sup>, Tailiang

Guo<sup>1</sup>, Fushan Li<sup>1,\*</sup>, Tae Whan Kim<sup>2,\*</sup>

<sup>1</sup>Institute of Optoelectronic Technology, Fuzhou University, Fuzhou 350108, People's  
Republic of China

<sup>2</sup> Department of Electronic and Computer Engineering, Hanyang University, Seoul  
133-791, Korea

\* Corresponding authors' E-mail addresses: fsli@fzu.edu.cn (F. Li),

twk@hanyang.ac.kr (T.W. Kim)

† These authors contributed equally to this work

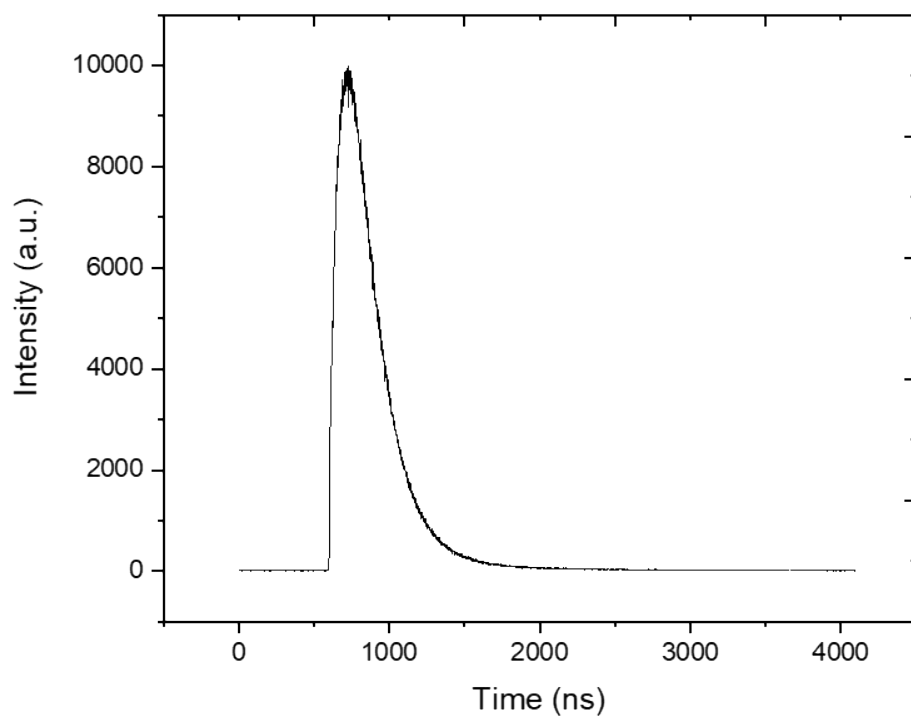

**Figure S1.** The time-resolved photoluminescence data of inorganic perovskite nanoplates

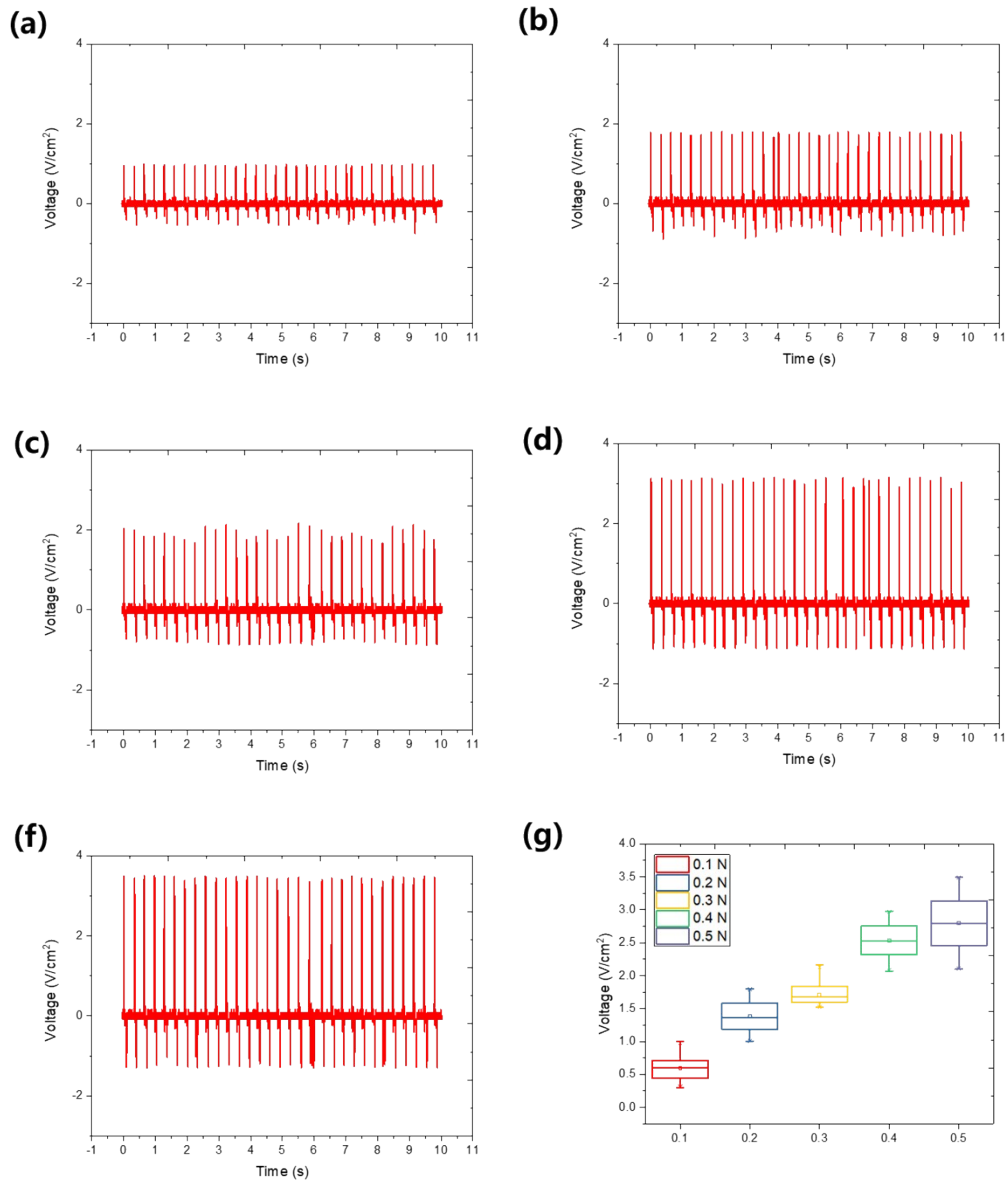

**Figure S2.** The Devices with structure: PET/PEDOT:PSS/perovskite NPs/Au. The voltage signal produced by the device in which 3Hz frequency and a force of 0.1N to 0.5N repeatedly stimulate the device in the darkroom.

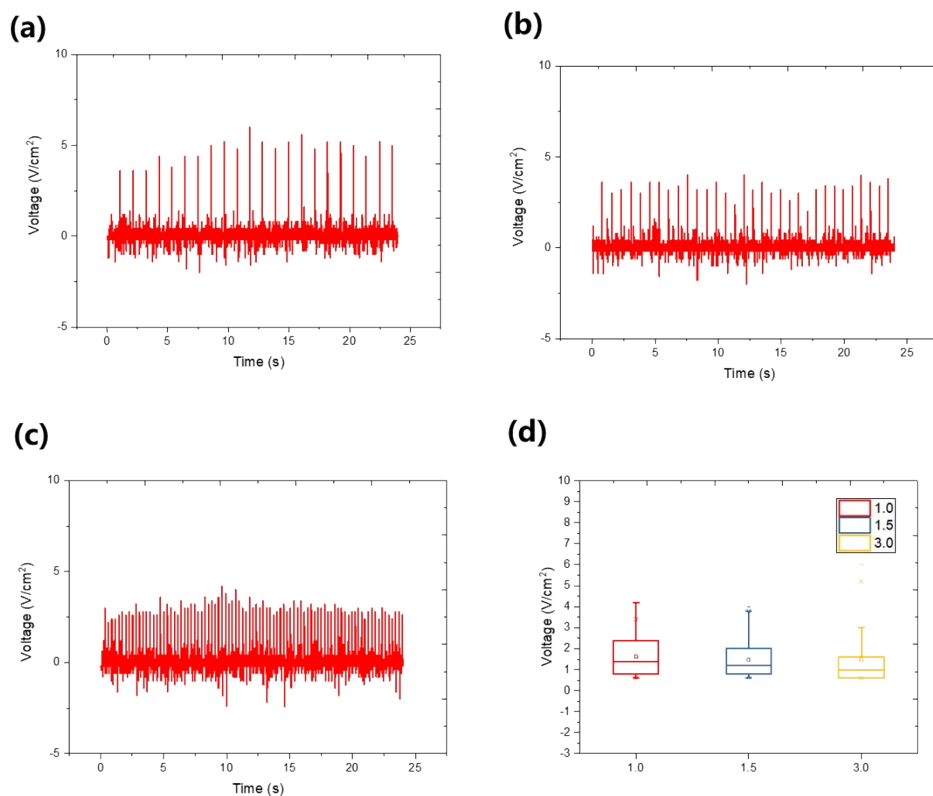

**Figure S3.** The Devices with structure: PET/PEDOT:PSS/perovskite NPs/Au. The voltage signal produced by the device in which 1Hz to 3Hz frequency and a force of 0.5N to repeatedly stimulate the device in the darkroom.

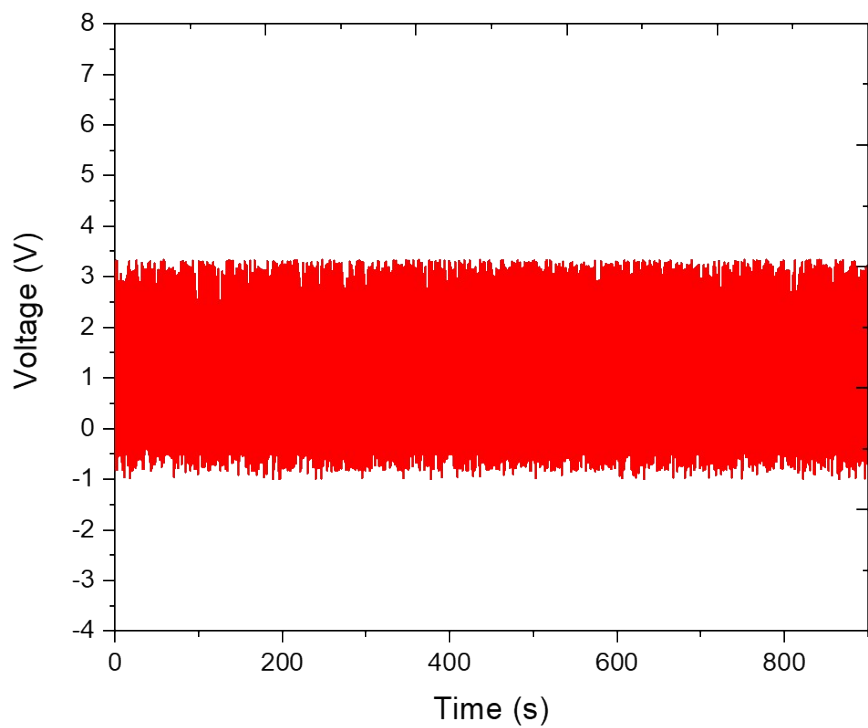

**Figure S4.** The Devices with structure: PET/PEDOT:PSS/perovskite NPs/Au. The voltage signal produced by the device in continuous work for 900 seconds, with 3Hz frequency and a force of 0.5N.

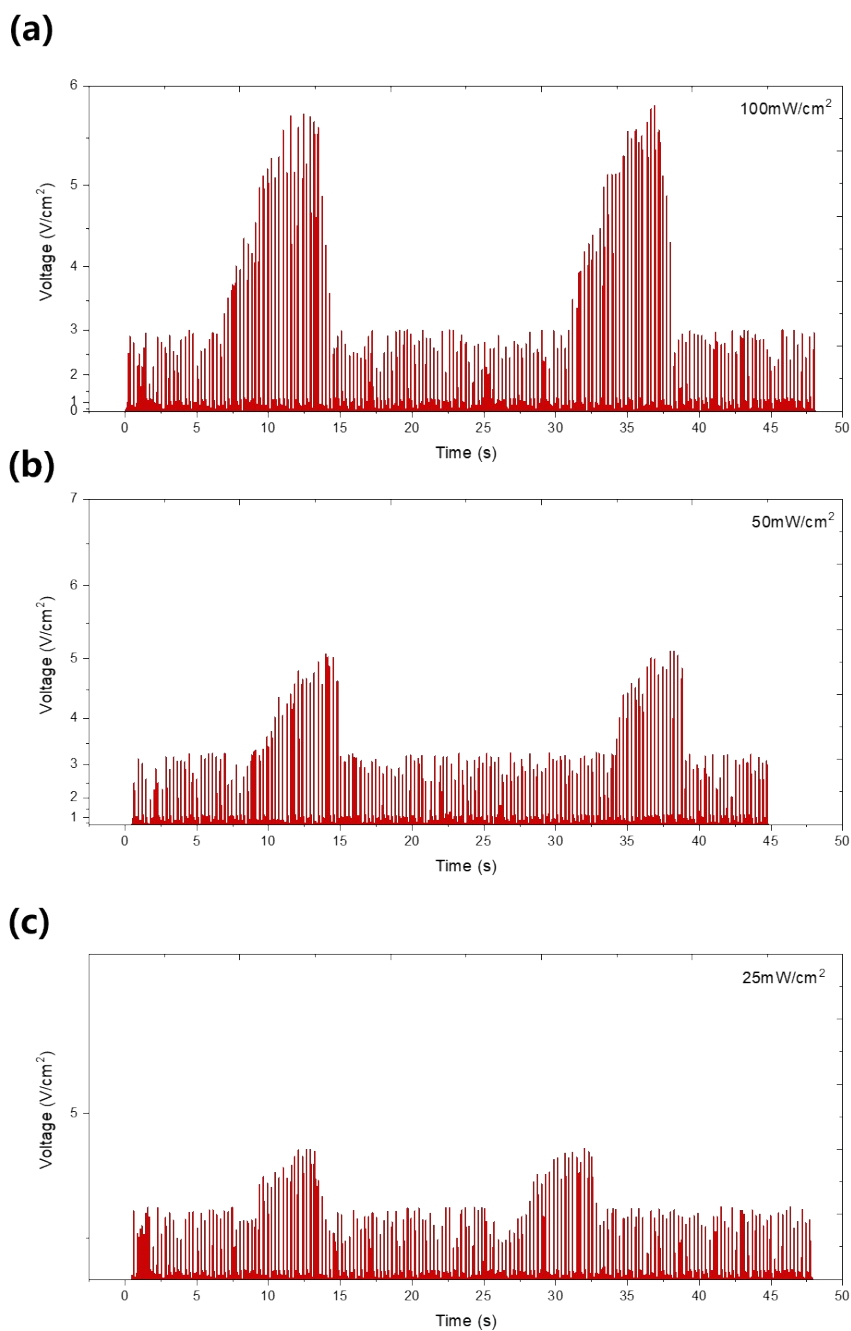

**Figure S5.** The Devices with structure: PET/PEDOT:PSS/perovskite NPs/Au. The voltage signal produced by the device, with 3Hz frequency and a force of 0.5N. Application of 8s UV irradiation twice, with intensity 75mW/cm<sup>2</sup> 50mW/cm<sup>2</sup> and 25mW/cm<sup>2</sup> repeatedly.

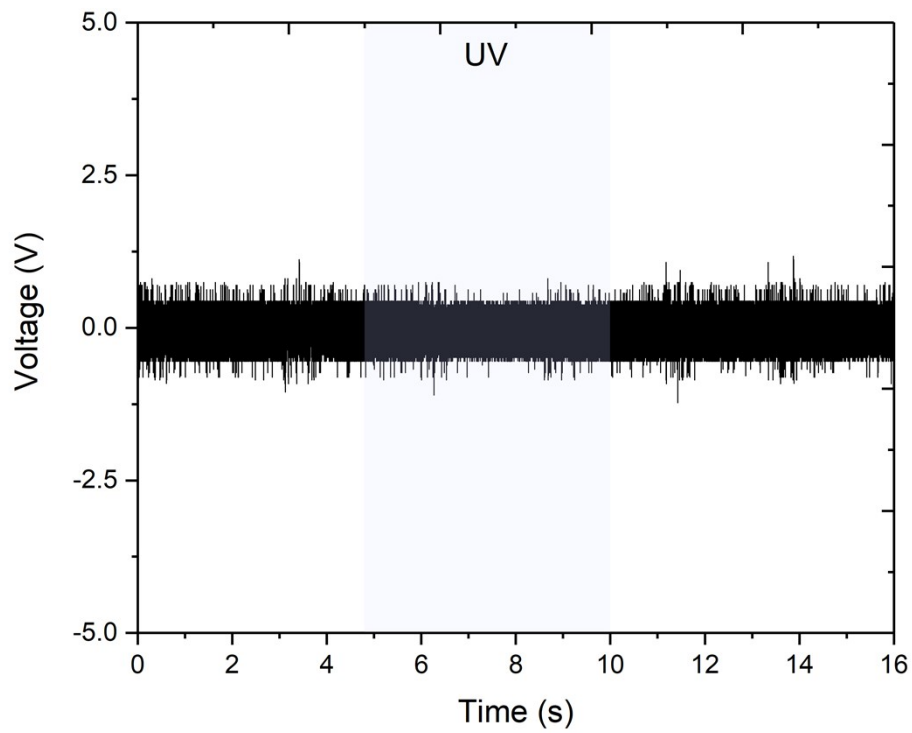

**Figure S6.** The Devices with structure: PET/PEDOT:PSS/perovskite NPs/Au. The voltage signal produced by the device, with intensity  $50\text{mW}/\text{cm}^2$ .

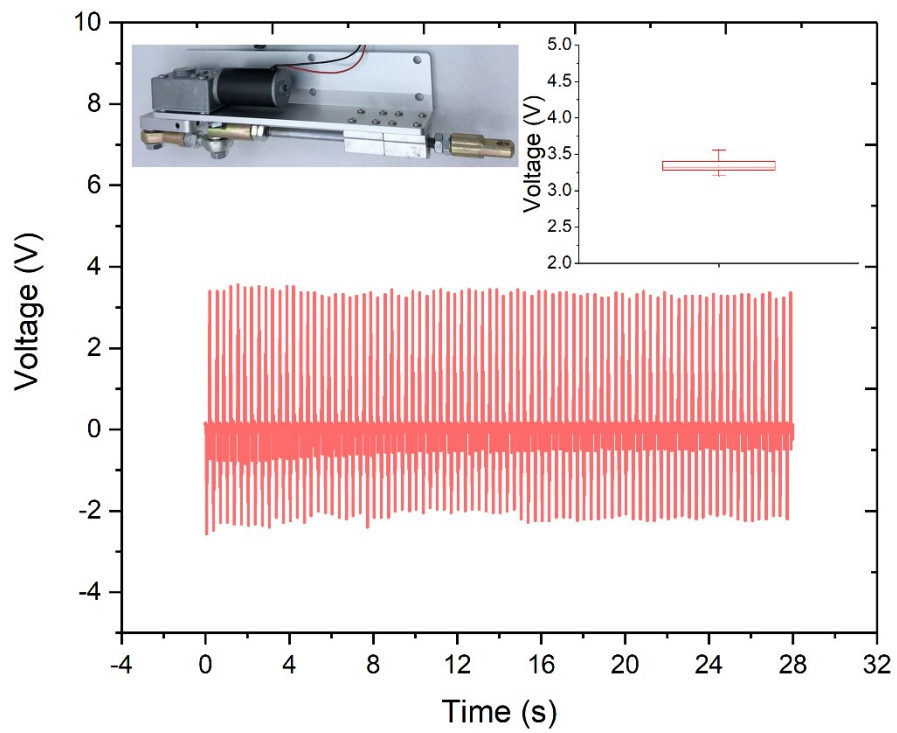

**Figure S7.** The Devices with structure: PET/PEDOT:PSS/perovskite NPs/Au. Voltage stability test (middle), statistical results (top right) and source of mechanical force(top left).



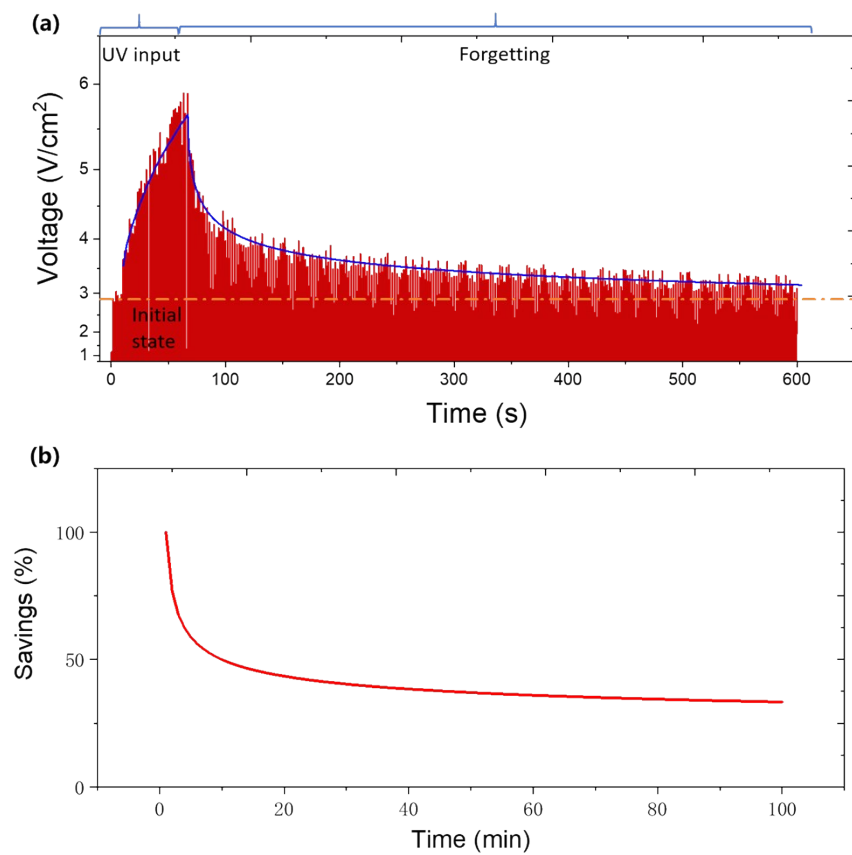

**Figure S8.** (a) The entire reaction loop. The voltage signal reflects the sensitivity of the UV irradiation. (b) Ebbinghaus's forgetting curve.

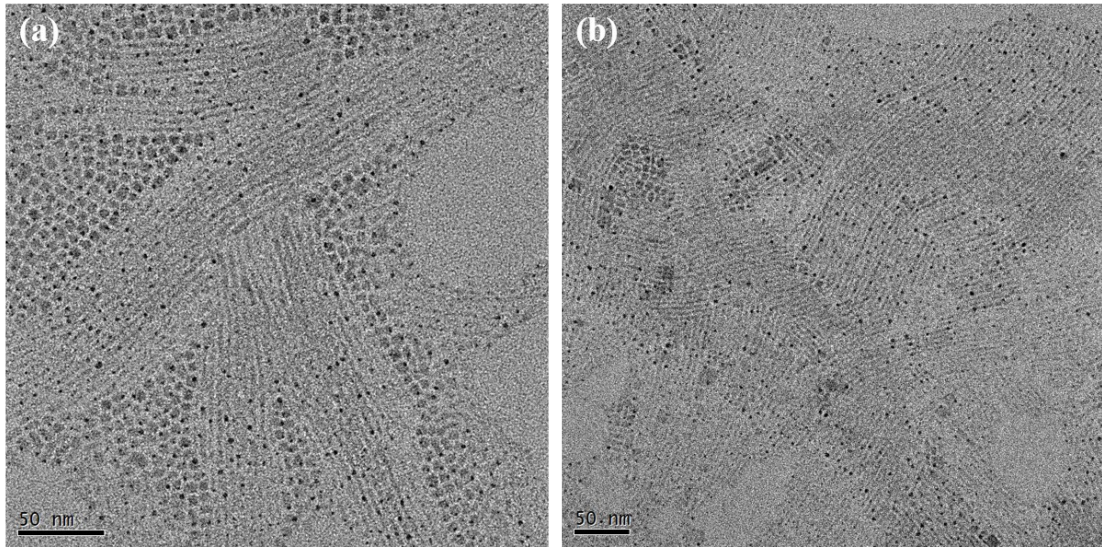

**Figure S9.** Transmission electron microscopy (TEM) image

| Title                                                                                                                                       | Journal/<br>Date            | Function           |                                                           |                                                   |                   |                   |                                  |
|---------------------------------------------------------------------------------------------------------------------------------------------|-----------------------------|--------------------|-----------------------------------------------------------|---------------------------------------------------|-------------------|-------------------|----------------------------------|
|                                                                                                                                             |                             | Material           | Application                                               | Input                                             | Output            | Power             | Structure                        |
| Self-Powered Tactile Sensor with Learning and Memory<br>(DOI: 10.1021/acsnano.9b07165)                                                      | ACS Nano/<br>Nov 2019       | PI:rGO             | Synapse (STP LTP PPF)<br>Tactile Sensor                   | Mechanical<br>force                               | Voltage<br>signal | Self-<br>powered  | Vertical<br>contact<br>TENG      |
| Configurable Resistive Response in BaTiO <sub>3</sub> Ferroelectric Memristors via Electron Beam Radiation<br>(DOI: 10.1002/adma.201907541) | AM/<br>Feb 2020             | BaTiO <sub>3</sub> | Memristor                                                 | Light<br>stimulation                              | Current<br>signal | External<br>power | Triode                           |
| Photoelectric Synaptic Plasticity Realized by 2D Perovskite<br>(DOI: 10.1002/adfm.201902538)                                                | AFM/<br>May 2019            | Perovskite         | Optoelectronic Synapse<br>(STP LTP PPF)                   | Light<br>stimulation                              | Current<br>signal | External<br>power | Triode                           |
| Artificial Synapses Based on Multiterminal Memtransistors for Neuromorphic Application<br>(DOI: 10.1002/adfm.201901106)                     | AFM/<br>April 2019          | MoS <sub>2</sub>   | Synapse (STP LTP PPF)                                     | Electrical<br>stimulation                         | Current<br>signal | External<br>power | Triode                           |
| Optoelectronic Perovskite Synapses for Neuromorphic Computing<br>(DOI: 10.1002/adfm.201908901)                                              | AFM/<br>Jan 2020            | Perovskite         | Optoelectronic Synapse<br>(STP LTP PPF)                   | Light<br>stimulation                              | Current<br>signal | External<br>power | Diode                            |
| Dual-Phase All-Inorganic Cesium Halide Perovskites for Conducting-Bridge Memory-Based Artificial Synapses<br>(DOI: 10.1002/adfm.201906686)  | AFM /<br>Sep 2019           | Perovskite         | Synapse (STP LTP PPF)<br>Tactile Sensor                   | Electrical<br>stimulation                         | Current<br>signal | External<br>power | Diode                            |
| Gating-induced reversible HxVO <sub>2</sub> phase transformations for neuromorphic computing<br>(DOI:10.1016/j.nanoen.2019.104268)          | Nano<br>Energy/<br>Jan 2020 | HVO <sub>2</sub>   | Synapse (STP LTP PPF)                                     | Electrical<br>stimulation                         | Current<br>signal | External<br>power | Triode                           |
| Self-powered artificial synapses actuated by triboelectric nanogenerator<br>(DOI: 10.1016/j.nanoen.2019.03.079)                             | Nano<br>Energy/<br>Jan 2019 | PDVT10<br>Ion-gel  | Synapse (STP LTP PPF)<br>Tactile Sensor                   | Mechanical<br>force                               | Current<br>signal | Self-<br>powered  | TENG<br>Triode                   |
| <b>This work</b>                                                                                                                            |                             | Perovskite         | Optoelectronic Synapse<br>(STP LTP PPF)<br>Tactile Sensor | <b>Mechanical force and<br/>Light stimulation</b> | Voltage<br>signal | Self-<br>powered  | <b>Single-electrode<br/>TENG</b> |

**Table S1.** Comparison of recent related research and our work.

**Video S1.** Test environment and device working process.
